# Supplementary material for: Rate of decline of antibody titers to pandemic influenza A (H1N1-2009) by hemagglutination inhibition and virus microneutralization assays in a cohort of seroconverting adults in Singapore
Source: PubMed Central journal article supplement (PMC4133624; doi:10.1186/1471-2334-14-414), 2014-07-28

**A. % with HI  $\geq 40$** 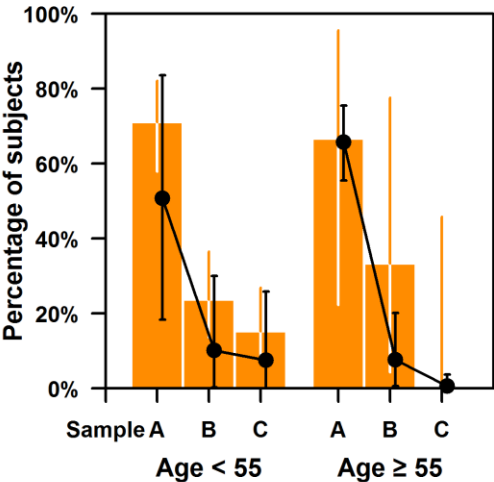**B. % with MN  $\geq 160$** 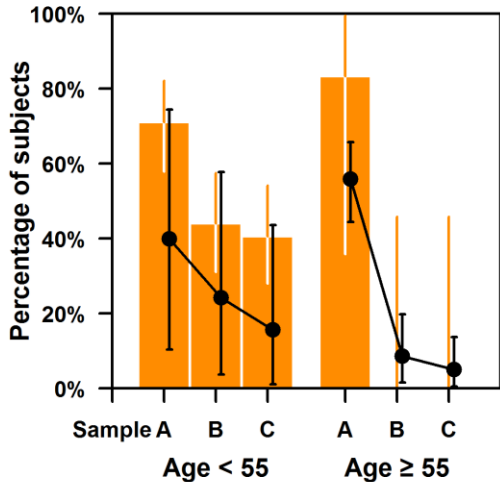

Supplement: 12879_2014_3734_MOESM5_ESM.pdf [file 12879_2014_3734_MOESM5_ESM.pdf]
